# Supplementary material for: Association Between Social Determinants of Health and Deliberate Self-Harm Among Youths With Psychiatric Diagnoses
Source: Atypon-hosted journal article supplement (doi:10.1176/appi.ps.20220180), 2022-11-15
Supplement: appi.ps.20220180.ds001.pdf [file appi.ps.20220180.ds001.pdf]

Table S1. International Classification of Disease, 10 Revision, Clinical Modification [ICD-10 CM] Codes for Self-Harm

|                                                                                                                                                                                                                                                                                                                                                                                                                                                                                                                                                                                                                                                                                                                                                                                                                                                                                                                                                                                                                                                                                                                                                                                                                                                                                                                                                                                                                                                                                                                                                                                                                                                                                                                                                                                                                                                                                                                                                                                                                                                                                                                                                                                                                                                                                                                                                                                                                                                                                                                                                                                                                                                                                                                                                                                                                                                                                                                                                                                                                                                                                                                                                                                                    |
|----------------------------------------------------------------------------------------------------------------------------------------------------------------------------------------------------------------------------------------------------------------------------------------------------------------------------------------------------------------------------------------------------------------------------------------------------------------------------------------------------------------------------------------------------------------------------------------------------------------------------------------------------------------------------------------------------------------------------------------------------------------------------------------------------------------------------------------------------------------------------------------------------------------------------------------------------------------------------------------------------------------------------------------------------------------------------------------------------------------------------------------------------------------------------------------------------------------------------------------------------------------------------------------------------------------------------------------------------------------------------------------------------------------------------------------------------------------------------------------------------------------------------------------------------------------------------------------------------------------------------------------------------------------------------------------------------------------------------------------------------------------------------------------------------------------------------------------------------------------------------------------------------------------------------------------------------------------------------------------------------------------------------------------------------------------------------------------------------------------------------------------------------------------------------------------------------------------------------------------------------------------------------------------------------------------------------------------------------------------------------------------------------------------------------------------------------------------------------------------------------------------------------------------------------------------------------------------------------------------------------------------------------------------------------------------------------------------------------------------------------------------------------------------------------------------------------------------------------------------------------------------------------------------------------------------------------------------------------------------------------------------------------------------------------------------------------------------------------------------------------------------------------------------------------------------------------|
| <p>T14.91,T36.0X2,T36.1X2,T36.2X2,T36.3X2,T36.4X2,T36.5X2,T36.5X4,T36.6X2,T36.7X2,T36.8X2,<br/> T36.92X,T37.0X2,T37.1X2,T37.2X2,T37.3X2,T37.4X2,T37.5X2,T37.8X2,T37.92X,T38.0X2,<br/> T38.1X2,T38.2X2,T38.3X2,T38.4X2,T38.6X2,T38.7X2,T38.802,T38.812,T38.892,T38.902,T38.992,<br/> T38.5X2,T39.012,T39.092,T39.1X2,T39.2X2,T39.312,T39.392,T39.4X2,T39.8X2,T39.92X,T40.0X2,<br/> T40.1X2,T40.2X2,T40.3X2,T40.4X2,T40.5X2,T40.602,T40.692,T40.7X2,T40.8X2,T40.902,T40.992,<br/> T41.0X2,T41.1X2,T41.202,T41.292,T41.3X2,T41.42X,T41.5X2,T42.0X2,T42.1X2,T42.2X2,<br/> T42.3X2,T42.4X2,T42.5X2,T42.6X2,T42.6X4,T42.72X,T42.8X2,T43.012,T43.022,T43.1X2,T43.202,<br/> T43.212,T43.222,T43.292,T43.3X2,T43.4X2,T43.502,T43.592,T43.602,T43.612,T43.622,T43.632,<br/> T43.692,T43.8X2,T43.92X,T44.0X2,T44.1X2,T44.2X2,T44.3X2,T44.4X2,T44.5X2,T44.6X2,<br/> T44.7X2,T44.8X2,T44.902,T44.992,T45.0X2,T45.1X2,T45.2X2,T45.3X2,T45.4X2,T45.512,T45.522,<br/> T45.602,T45.612,T45.622,T45.692,T45.7X2,T45.8X2,T45.92X,T46.0X2,T46.1X2,T46.2X2,T46.3X2,<br/> T46.4X2,T46.5X2,T46.6X2,T46.7X2,T46.8X2,T46.902,T46.992,T47.0X2,T47.1X2,T47.2X2,<br/> T47.3X2,T47.4X2,T47.5X2,T47.6X2,T47.7X2,T47.8X2,T47.92X,T48.0X2,T48.1X2,T48.202,<br/> T48.292,T48.3X2,T48.4X2,T48.5X2,T48.6X2,T48.902,T48.992,T49.0X2,T49.1X2,T49.2X2,T49.3X2,<br/> T49.4X2,T49.5X2,T49.6X2,T49.7X2,T49.8X2,T49.92X,T50.0X2,T50.1X2,T50.2X2,T50.3X2,<br/> T50.4X2,T50.5X2,T50.6X2,T50.7X2,T50.8X2,T50.902,T50.992,T50.A12,T50.A22,T50.B12,<br/> T50.B92,T50.Z12,T50.Z92,T51.0X2,T51.1X2,T51.2X2,T51.3X2,T51.8X2,T51.92X,T52.0X2,<br/> T52.1X2,T52.2X2,T52.3X2,T52.4X2,T52.8X2,T52.92X,T53.0X2,T53.1X2,T53.2X2,T53.3X2,T53.4X2,<br/> T53.5X2,T53.6X2,T53.7X2,T53.92X,T54.0X2,T54.1X2,T54.2X2,T54.3X2,T54.92X,T55.0X2,<br/> T55.1X2,T56.0X2,T56.1X2,T56.2X2,T56.3X2,T56.4X2,T56.5X2,T56.6X2,T56.7X2,T56.812,<br/> T56.892,T56.92X,T57.0X2,T57.1X2,T57.2X2,T57.3X2,T57.8X2,T57.92X,T58.02X,T58.12X,<br/> T58.2X2,T58.8X2,T58.92X,T59.0X2,T59.1X2,T59.2X2,T59.3X2,T59.4X2,T59.5X2,T59.6X2,<br/> T59.7X2,T59.812,T59.892,T59.92X,T5A.092,T60.0X2,T60.1X2,T60.2X2,T60.3X2,T60.4X2,<br/> T60.8X2,T60.92X,T61.02X,T61.12X,T61.772,T61.782,T61.8X2,T61.92X,T62.0X2,T62.1X2,<br/> T62.2X2,T62.8X2,T62.92X,T63.002,T63.012,T63.022,T63.032,T63.042,T63.062,T63.072,<br/> T63.082,T63.092,T63.112,T63.122,T63.192,T63.2X2,T63.302,T63.312,T63.322,T63.332,<br/> T63.392,T63.412,T63.422,T63.432,T63.442,T63.452,T63.462,T63.482,T63.512,T63.592,<br/> T63.612,T63.622,T63.632,T63.692,T63.712,T63.792,T63.812,T63.822,T63.832,T63.892,<br/> T63.92X,T64.02X,T64.82X,T65.0X2,T65.1X2,T65.212,T65.222,T65.292,T65.3X2,T65.4X2,<br/> T65.5X2,T65.6X2,T65.812,T65.822,T65.832,T65.892,T65.92X,T71.112,T71.122,T71.132,<br/> T71.152,T71.162,T71.192,T71.222,T71.232,X71.0XX,X71.1XX,X71.2XX,X71.3XX,X71.8XX,<br/> X71.9XX,X72.XXX,X73.0XX,X73.1XX,X73.2XX,X73.8XX,X73.9XX,X74.01X,X74.02X,X74.09X,<br/> X74.8XX,X74.9XX,X75.XXX,X76.XXX,X77.0XX,X77.1XX,X77.2XX,X77.3XX,X77.8XX,X77.9XX,<br/> X78.0XX,X78.1XX,X78.2XX,X78.8XX,X78.9XX,X79.XXX,X80.XXX,X81.0XX,X81.1XX,X81.8XX,<br/> X82.0XX,X82.1XX,X82.2XX,X82.8XX,X83.0XX,X83.1XX, X83.2XX,X83.8XX</p> |
|----------------------------------------------------------------------------------------------------------------------------------------------------------------------------------------------------------------------------------------------------------------------------------------------------------------------------------------------------------------------------------------------------------------------------------------------------------------------------------------------------------------------------------------------------------------------------------------------------------------------------------------------------------------------------------------------------------------------------------------------------------------------------------------------------------------------------------------------------------------------------------------------------------------------------------------------------------------------------------------------------------------------------------------------------------------------------------------------------------------------------------------------------------------------------------------------------------------------------------------------------------------------------------------------------------------------------------------------------------------------------------------------------------------------------------------------------------------------------------------------------------------------------------------------------------------------------------------------------------------------------------------------------------------------------------------------------------------------------------------------------------------------------------------------------------------------------------------------------------------------------------------------------------------------------------------------------------------------------------------------------------------------------------------------------------------------------------------------------------------------------------------------------------------------------------------------------------------------------------------------------------------------------------------------------------------------------------------------------------------------------------------------------------------------------------------------------------------------------------------------------------------------------------------------------------------------------------------------------------------------------------------------------------------------------------------------------------------------------------------------------------------------------------------------------------------------------------------------------------------------------------------------------------------------------------------------------------------------------------------------------------------------------------------------------------------------------------------------------------------------------------------------------------------------------------------------------|

Table S2. International Classification of Disease, 10 Revision, Clinical Modification [ICD-10 CM] Codes for Social Determinants of Health

| Category                         | ICD-10 CM codes                                                                                                                                                                                                                                                                                                                                                                                                                                                                                                                                                                                                                                                                                                                                                                                                                                                                                                       |
|----------------------------------|-----------------------------------------------------------------------------------------------------------------------------------------------------------------------------------------------------------------------------------------------------------------------------------------------------------------------------------------------------------------------------------------------------------------------------------------------------------------------------------------------------------------------------------------------------------------------------------------------------------------------------------------------------------------------------------------------------------------------------------------------------------------------------------------------------------------------------------------------------------------------------------------------------------------------|
| Legal issues                     | Z65.0: Conviction in civil and criminal proceedings without imprisonment; Z65.1: Imprisonment and other incarceration, Z65.2: Problems related to release from prison; Y92.14: Prison as the place of occurrence of the external cause                                                                                                                                                                                                                                                                                                                                                                                                                                                                                                                                                                                                                                                                                |
| Nonspecific psychosocial needs   | Z65.8: Other specified problems related to psychosocial circumstances; Z65.9: Problem related to unspecified psychosocial circumstances                                                                                                                                                                                                                                                                                                                                                                                                                                                                                                                                                                                                                                                                                                                                                                               |
| Exposure to violence             | X92: Assault by drowning and submersion; X93: Assault by handgun discharge; X94: Assault by rifle, shotgun and larger firearm discharge; X95: Assault by other and unspecified firearm and gun discharge; X96: Assault by explosive material; X97: Assault by smoke, fire and flames; X98: Assault by steam, hot vapors and hot objects; X99: Assault by sharp object; Y00: Assault by blunt object; Y01: Assault by pushing from high place; Y02: Assault by pushing or placing victim in front of moving object; Y03: Assault by crashing of motor vehicle; Y04: Assault by bodily force; Y08: Assault by other specified means; Y09: Assault by unspecified means; Y35: Legal intervention injury; Y36: Operations of war; Y37: Military operations; Y38: Terrorism; Z65.5: Exposure to disaster, war and other hostilities;                                                                                       |
| Abuse and neglect                | F431: Post-traumatic stress disorder; O9A.3-5: Abuse complicating pregnancy; T74: Neglect or abandonment, confirmed; T76: Neglect or abandonment, suspected; Y07: Perpetrator of assault, maltreatment, or neglect; Z04.4: Encounter for examination and observation following alleged rape; Z04.7: Encounter for examination and observation following alleged physical abuse; Z04.81: Encounter for examination and observation following forced sexual exploitation; Z61.4: Problems related to alleged sexual abuse of child by person within primary support group; Z61.5: Problems related to alleged sexual abuse of child by person outside primary support group; Z61.6: Problems related to alleged physical abuse of child; Z62.81: Personal history of abuse in childhood; Z69: Encounter for mental health services for victim and perpetrator of abuse; Z91.4: Personal history of psychological trauma |
| Employment or financial problems | Z56: Problems related to employment/unemployment; Z59.4: Lack of adequate food and safe drinking water; Z59.5: Extreme poverty; Z59.6: Low income; Z59.7: Insufficient social insurance and welfare support; Z59.8: Other problems related to housing and economic circumstances; Z59.9: Problem related to housing and economic circumstances, unspecified                                                                                                                                                                                                                                                                                                                                                                                                                                                                                                                                                           |
| Housing instability              | Z59.0: Homelessness; Z59.1: Inadequate housing                                                                                                                                                                                                                                                                                                                                                                                                                                                                                                                                                                                                                                                                                                                                                                                                                                                                        |

|                                         |                                                                                                                                                                |
|-----------------------------------------|----------------------------------------------------------------------------------------------------------------------------------------------------------------|
| Social environmental problem            | Z59.2: Discord with neighbors, lodgers and landlord; Z59.3: Problems related to living in residential institution; Z60: Problems related to social environment |
| Educational problems                    | Z55: Problems related to education or literacy                                                                                                                 |
| Child welfare placement                 | Z62.21: Child in welfare custody                                                                                                                               |
| Parent-child conflict                   | Z62.82: Parent-child conflict                                                                                                                                  |
| Disappearance/death of family member    | Z63.4: Disappearance and death of family member                                                                                                                |
| Family disruption by separation/divorce | Z63.5: Disruption of family by separation and divorce                                                                                                          |
| Family alcohol/drug use                 | Z63.72: Alcoholism and drug addiction in family                                                                                                                |
| Other family problems                   | Z62: Problems related to upbringing (excluding those listed above); Z63: Problems related to primary support group (excluding those listed above)              |

Table S3. International Classification of Disease, 10 Revision, Clinical Modification [ICD-10 CM] Codes for Psychiatric Conditions

|                           | ICD 10 Codes    |
|---------------------------|-----------------|
| Psychiatric Comorbidities |                 |
| ADHD                      | F90             |
| Anxiety Disorders         | F40-F41, F44    |
| Bipolar Disorder          | F30-F31, F34.0, |
| Depressive Disorder       | F32-F33, F34.1  |
| Disruptive Disorders      | F91             |
| Intellectual Disabilities | F70-F79, F84    |
| Personality Disorders     | F21, F60        |
| Schizophrenia             | F20, F22-F29    |
| Substance Use Disorder    | F10-F19         |
| Suicidal Ideation         | R45.851         |
